# Supplementary material for: Inference of Gene Regulatory Network Uncovers the Linkage between Circadian Clock and Crassulacean Acid Metabolism in Kalanchoë fedtschenkoi
Source: MDPI journal article supplement (doi:10.3390/cells10092217), 2021-08-27
Supplement: s1 [file s1]

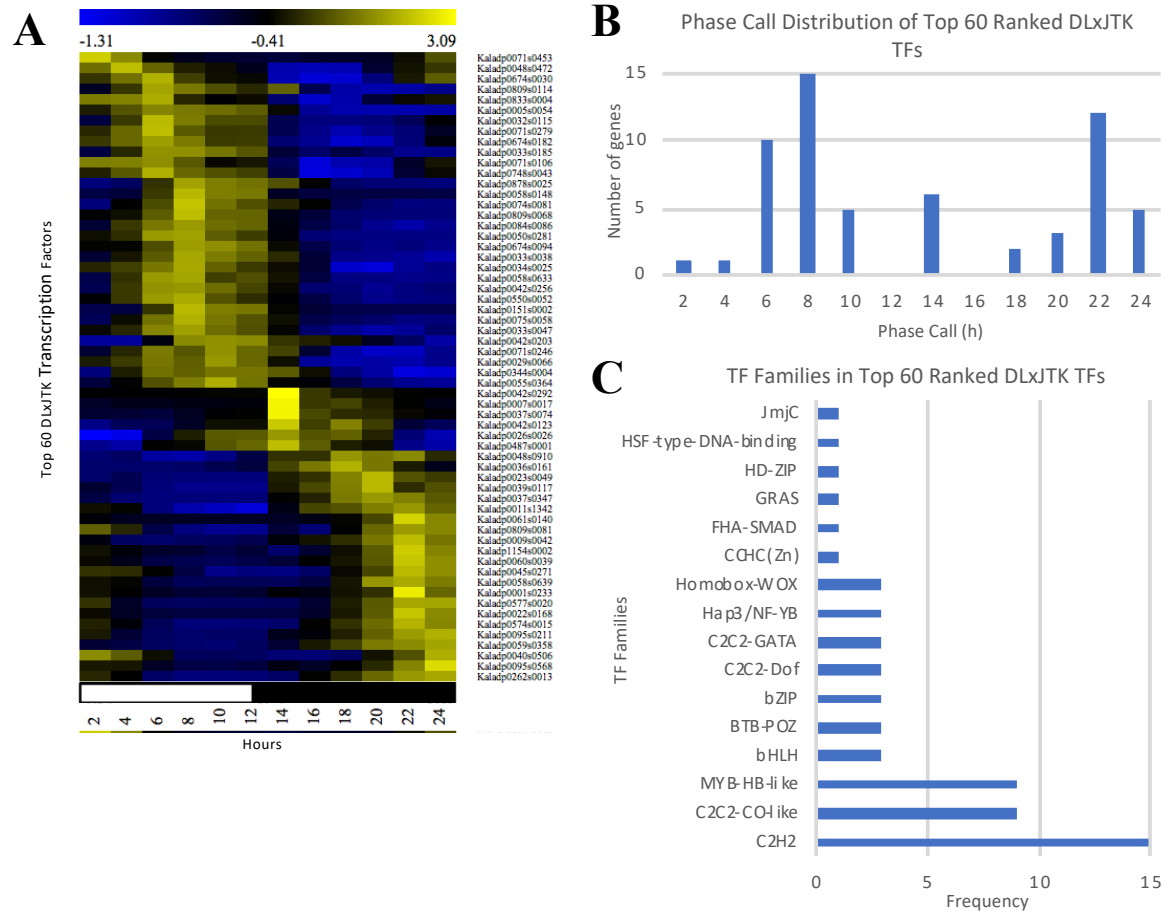

**Figure S2.** Assessment of transcription factors identified by DLxJTK. **(a)** Heatmap displaying z-score standardized expression profiles of the top 60 transcription factors (TFs) pulled from DLxJTK ranked ordered gene list. White and black bars indicate daytime (12-hour) and nighttime (12-hour), respectively. **(b)** Phase call distributions of the top 60 TFs identified with DLxJTK. **(c)** Frequency of TF families in the top 60 TFs identified with DLxJTK.
