# Supplementary material for: Inference of Gene Regulatory Network Uncovers the Linkage between Circadian Clock and Crassulacean Acid Metabolism in Kalanchoë fedtschenkoi
Source: MDPI journal article supplement (doi:10.3390/cells10092217), 2021-08-27
Supplement: s1 [file s1]

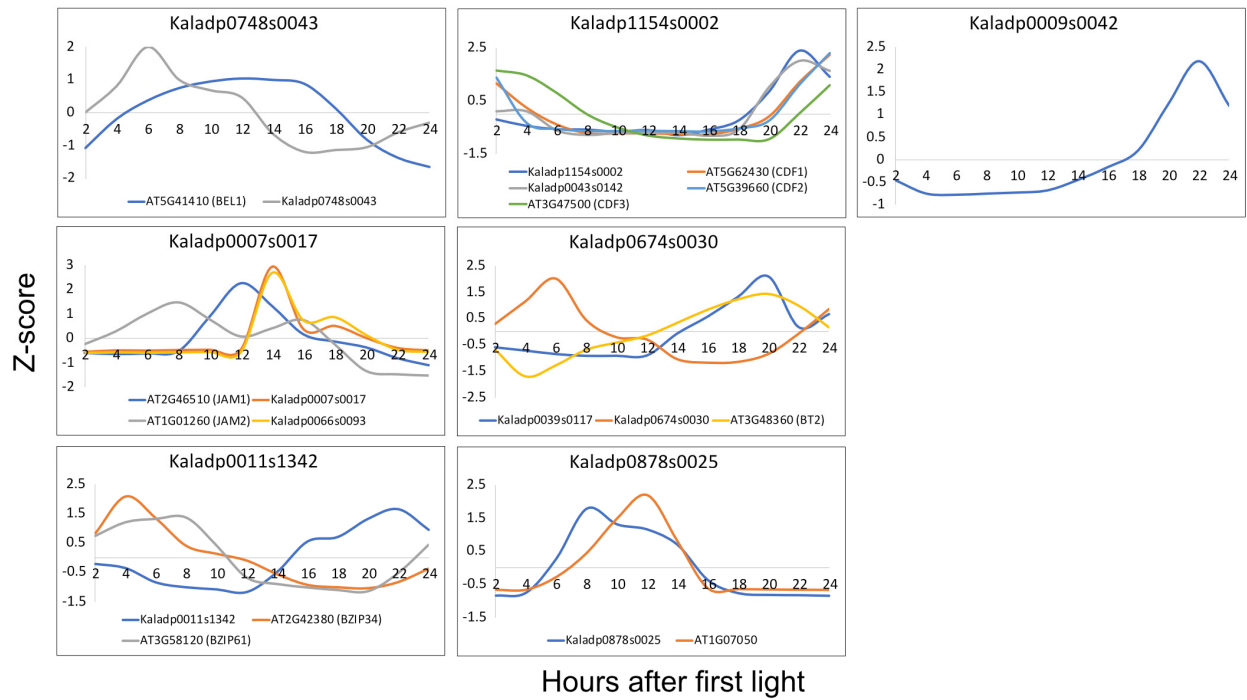

**Figure S3.** *Kalanchoë fedtschenkoi* candidate clock transcription factors and their *Arabidopsis thaliana* orthologs. Z-score standardized expression profiles of the *K. fedtschenkoi* candidate clock transcription factors, as well as their respective paralogs and *A.s thaliana* orthologs if present.
